# Supplementary material for: Estrogen therapy offsets thermal impairment of vitellogenesis, but not zonagenesis, in maiden spawning female Atlantic salmon (Salmo salar)
Source: PeerJ. 2017 Nov 2;5:e3897. doi: 10.7717/peerj.3897 (PMC5671662; doi:10.7717/peerj.3897)
Supplement: Data S1 [file peerj-05-3897-s002.xls]

## Sheet: Sample 1
Group	Fish	Length (mm)	Weight (kg)	Condition Factor	Gonad Wt. (g)	Gonad sub-sample (g)	G.S.I. (%)	Follicle Count	Fecundity	Relative Fecundity	Follicle Diameters (mm)
											1	2	3	4	5	6	7	8	9	10	11	12	13	14	15	16	17	18	19	20	21	22	23	24	25	26	27	28	29	30	31	32	33	34	35	36	37	38	39
1	1	590	2.95	1.43637	227	4.5	0.0769492	114	5750.67	1949.38	4.5	4.5	4.5	4.5	4.5	4.5	4.5	4.5	4.5	4.5	4.5	4.5	3.9	3.9	3.9	3.9	3.9	3.9	4.2	4.2	4.2	4.2	4.2	4.2	4.2	4.2	4.2	4.2	3.6	3.6	3.6	3.6	3.6	3.6	3.6	3.6	3.6	4.4	4.4
Maiden	2	620	3.25	1.36367	211	3.6	0.0649231	90	5275	1623.08	3.1	3.6	3.7	3.7	3.7	3.7	3.8	3.8	3.9	3.9	3.9	3.9	3.9	3.9	4	4	4	4	4	4	4	4	4	4.1	4.1	4.1	4.1	4.1	4.1	4.1	4.1	4.1	4.1	4.1	4.1	4.2	4.2	4.2	4.2
	3	755	6.2	1.44062	363	4.6	0.0585484	126	9943.04	1603.72	2.7	2.7	2.7	2.9	2.9	3	3.2	3.3	3.7	3.8	3.8	3.8	3.9	3.9	3.9	4	4	4	4	4	4	4	4	4	4	4	4.1	4.1	4.1	4.1	4.1	4.1	4.1	4.1	4.1	4.1	4.1	4.1	4.2
	4	715	6.05	1.65515	590	4.2	0.0975207	89	12502.4	2066.51	2.9	3.2	3.4	3.5	3.6	3.9	3.9	4	4	4.1	4.2	4.3	4.3	4.4	4.5	4.5	4.5	4.5	4.5	4.5	4.5	4.5	4.5	4.5	5.6	5.4	5.4	4.6	4.6	4.6	4.6	4.6	4.7	4.7	4.7	4.7	4.7	4.7	4.7
	5	715	5.75	1.57308	479	4.3	0.0833043	102	11362.3	1976.06	2.6	2.6	2.6	2.9	3	3.2	3.2	3.2	3.3	3.4	3.6	3.7	3.8	3.8	3.8	4	4	4	4	4.1	4.1	4.1	4.2	4.2	4.2	4.2	4.2	4.2	4.3	4.3	4.3	4.3	4.3	4.3	4.3	4.3	4.4	4.4	4.5
	6	650	4.15	1.51115	290	4.4	0.0698795	144	9490.91	2286.97	2.7	3	3.1	3.1	3.1	3.1	3.2	3.2	3.2	3.2	3.3	3.3	3.4	3.5	3.5	3.6	3.6	3.6	3.6	3.6	3.7	3.7	3.7	3.7	3.7	3.7	3.8	3.8	3.8	3.8	3.8	3.8	3.8	3.9	3.9	3.9	3.9	3.9	3.9
	7	680	4.55	1.44705	116	3.1	0.0254945	201	7521.29	1653.03	2	2	2	2	2.1	2.1	2.1	2.2	2.2	2.3	2.3	2.3	2.3	2.4	2.4	2.4	2.4	2.5	2.5	2.5	2.5	2.5	2.5	2.6	2.6	2.6	1.9	1.8	3.5	3.5	3.5	3.5	3.5	3.5	3.5	3.4	3.4	3.4	3.4
	Mean	675	4.7	1.48958	325.143	4.1	0.0680885	123.714	8835.09	1879.82
	SEM	22.0929	0.503913	0.0370781	62.2764	0.20702	0.008584	14.8784	1039.78	98.5978
Fish transferred and sacrificed on the 17th Feb 2010
	1	45	45	45	45	45	45	45	45	45	45	45	45	39	39	39	39	39	39	42	42	42	42	42	42	42	42	42	42	36	36	36	36	36	36	36	36	36	44	44	44	44	44	44	44	44	44	44	44
	2	31	36	37	37	37	37	38	38	39	39	39	39	39	39	40	40	40	40	40	40	40	40	40	41	41	41	41	41	41	41	41	41	41	41	41	42	42	42	42	42	42	42	42	42	42	42	42	42
	3	27	27	27	29	29	30	32	33	37	38	38	38	39	39	39	40	40	40	40	40	40	40	40	40	40	40	41	41	41	41	41	41	41	41	41	41	41	41	42	42	42	42	42	42	42	42	42	42
	4	29	32	34	35	36	39	39	40	40	41	42	43	43	44	45	45	45	45	45	45	45	45	45	45	56	54	54	46	46	46	46	46	47	47	47	47	47	47	47	48	48	48	48	48	48	48	48	48
	5	26	26	26	29	30	32	32	32	33	34	36	37	38	38	38	40	40	40	40	41	41	41	42	42	42	42	42	42	43	43	43	43	43	43	43	43	44	44	45	45	45	45	45	45	46	46	46	46
	6	27	30	31	31	31	31	32	32	32	32	33	33	34	35	35	36	36	36	36	36	37	37	37	37	37	37	38	38	38	38	38	38	38	39	39	39	39	39	39	40	40	40	40	40	40	40	40	40
	7	20	20	20	20	21	21	21	22	22	23	23	23	23	24	24	24	24	25	25	25	25	25	25	26	26	26	19	18	35	35	35	35	35	35	35	34	34	34	34	34	34	34	27	27	27	27	27	27
		Average daim	SD
	1	41.8	3.30738
	2	40.14	2.10936
	3	38.76	4.44724
	4	44.76	5.14111
	5	40	5.74989
	6	36.42	3.38116
	7	26.78	5.37299
	All fish	38.38	6.86473
[truncated: 12 more columns]

## Sheet: Sample 2
Group	Fish	Length (mm)	Weight (kg)	Condition Factor	Gonad Wt. (g)	Gonad sub-sample (g)	G.S.I. (%)	Follicle Count	Fecundity	Relative Fecundity	Follicle Diameters (mm)
											1	2	3	4	5	6	7	8	9	10	11	12	13	14	15	16	17	18	19	20	Mean fd
1	1	650	3.8	1.38371	341.5	3.7	0.0898684	114	10521.9	2768.92	4.9	4.6	5.1	4.4	5	4.7	4.7	4.8	4.7	4.3	4.3	4.2	4.8	4.7	4.8	4.6	5	4.6	4.5	4.5	4.66	46.6
14oC	2	660	4.2	1.46089	347.1	3.6	0.0826429	90	8677.5	2066.07	4.8	5	5	5	5	4.3	5.1	4.6	5	4	4.5	4.2	4.2	4.8	4.6	5	4.8	4.7	4.8	3.7	4.66	46.6
	3	600	3.25	1.50463	288	3	0.0886154	126	12096	3721.85	3.8	4.5	4.8	3.5	4.2	4.5	4.2	3.8	3.8	4.3	3.5	4	4.5	4.5	4.2	4.2	4.2	4.3	3.5	4.3	4.13	41.3
	4	680	4.35	1.38345	425.5	5.2	0.0978161	89	7282.6	1674.16	4.8	4.8	4.5	5	4.9	4	4.7	4.5	4.6	4.7	4.1	5.2	3.2	5	4.5	5	4.1	3.5	4.3	4.3	4.49	44.9
	5	635	3.75	1.46457	310.7	3.4	0.0828533	102	9321	2485.6	4	4.8	4.4	3.6	4.5	4.5	4.2	4.5	4.5	4.5	4.2	4.5	4.6	4.3	4.5	4.7	3.5	4.7	5	4.5	4.4	44
	6	635	3.7	1.44504	350.8	4.4	0.0948108	144	11480.7	3102.9	4.8	4.3	4.3	4.2	4.5	4.5	4	4	4	4.3	4.5	4	4.7	3.8	3.5	4.5	4.3	4.8	4.9	4.6	4.33	43.3
	7	635	3.55	1.38646	288.1	3.5	0.0811549	201	16545.2	4660.61	4.5	4.5	3.8	4.7	3.8	4	4.3	3.9	4	4.1	4.5	4.5	3.5	3.6	4.3	4.3	4	4.1	4.1	3.9	4.12	41.2
	Mean	642.143	3.8	1.43268	335.957	3.82857	0.0882517	123.714	10846.4	2925.73																					4.39857
	SEM	9.44011	0.141421	0.0183232	18.0088	0.278358	0.00243101	14.8784	1136.8	384.173																					0.084443
2	1	630	3.9	1.55971	394.6	4.7	0.101179	114	9571.15	2454.14	3.8	4.3	4.1	4.5	4.2	4.2	4.3	4	4.2	4.2	4.3	4	4	4.7	4.3	4.3	4.5	3.7	3.7	4.3	4.18	41.8
22oC	2	645	3.8	1.41613	363.1	4.2	0.0955526	90	7780.71	2047.56	4.8	3.6	4.7	4.3	4.3	4.3	4.2	4.5	4	4.5	3.5	4.5	4.8	4.3	4.3	4.7	4.5	4.8	4.8	4.5	4.395	43.95
	3	650	3.95	1.43832	340.8	3.2	0.0862785	126	13419	3397.22	3.8	4.7	4.6	4	3.8	4.1	4.3	4.3	4.2	4.3	4.3	4.5	4.4	4.5	3.7	4.3	4	3.6	4.7	3.8	4.195	41.95
	4	605	2.75	1.24184	186.5	3.9	0.0678182	89	4256.03	1547.65	4.5	4.2	4	4.8	4	4.3	4.5	4.2	4.5	4.1	4.5	4.4	4.5	4.2	4.3	4.5	4.2	4.3	4.2	4.6	4.34	43.4
	5	665	4.4	1.49619	407.7	4	0.0926591	102	10396.4	2362.81	4.5	4.5	4	4.2	4.5	4.3	4.2	4.4	4.7	4	3.7	4.2	4.5	5	4.3	4.5	4.6	3.9	4.1	4.3	4.32	43.2
	6	625	3	1.2288	69.7	2.9	0.0232333	144	3460.97	1153.66	3	2.6	2.6	2.8	2.5	2.7	2.3	2.8	2.8	2.6	2.8	3	2.6	2.6	2.6	3	2.8	2.8	2.3	2.5	2.7	27
	7	670	3.7	1.2302	116
	Mean	641.429	3.64286	1.37303	268.343	3.81667	0.0777869	110.833	8147.37	2160.5																					4.02167
	SEM	8.70921	0.216693	0.0522244	53.2192	0.250048	0.0109956	8.15709	1435.41	295.62																					0.246787
3	1	715	4.75	1.2995	249.5	4	0.0525263	114	7110.75	1497	3.2	3.7	3.8	3.9	4.1	3.7	3.2	3.9	4.1	3.8	3	3.2	3.9	3.9	3.7	3.6	3.8	3.8	3.8	4.1	3.71	37.1
22pellet	2
	3	640	3.8	1.44958	306.3	3.8	0.0806053	126	10156.3	2672.7	4	5	4.3	4.6	5	4.2	4.7	5	5	5.5	4	5	5.1	4.8	4.9	4.8	4.2	3.6	4.7	4.2	4.63	46.3
	4	680	4.85	1.54246	577.9	5.9	0.119155	89	8717.47	1797.42	4.9	4.8	4.7	4.9	5.2	5	5	5	4.7	4.5	4.9	5.2	4.5	5	5	5	4.7	4.5	5	4.8	4.865	48.65
	5	645	3.75	1.3975	341.6	5	0.0910933	102	6968.64	1858.3	4.3	4	4.9	4.3	4.7	4.9	4.8	4	4.8	5	5	4.7	4	4.3	4.7	4.7	5	4.8	4.5	4.8	4.61	46.1
	6	625	3.65	1.49504	269.4	4.5	0.0738082	144	8620.8	2361.86	3.1	4.5	4.5	4.8	4.2	4.2	4.2	4.2	4.3	4.7	4	4	4.2	4.1	4.3	4.3	4.2	4.2	4	4.3	4.215	42.15
	7
	Mean	661	4.16	1.43682	348.94	4.64	0.0834376	115	8314.79	2037.46																					4.406
	SEM	13.7191	0.222165	0.0354142	50.1817	0.319151	0.00924	8.03563	496.727	178.344																					0.171482
Statistics											Foll diam
F		0.893	1.517	0.775	0.948		0.396		1.661	2.163	1.331
P		0.429	0.249	0.477	0.408		0.68		0.223	0.15	0.294
Means

## Sheet: Sample 3
Group	Fish	Length (mm)	Weight (kg)	Condition Factor	Gonad Wt. (g)	Gonad sub-sample (g)	G.S.I. (%)	Follicle Count	Fecundity	Relative Fecundity	Follicle Diameters (mm)
											1	2	3	4	5	6	7	8	9	10	11	12	13	14	15	16	17	18	19	20	Mean fd
1	1	670	3.8	1.26345	249.5	4.1	0.0656579	92	5598.54	1473.3	4.3	4.2	4.1	4.4	4.2	4.3	4.2	4.3	4.2	4.6	4.6	4.2	4.3	4.3	4	4.2	4.3	4.2	4.2	4	4.255	42.55
14oC	2	635	3.3	1.28882	247.4	5	0.0749697	92	4552.16	1379.44	4.6	4.3	4.5	4.5	4.7	4.7	4.5	4.9	4.5	4.5	5	4.5	4.3	4.2	4.8	4.7	4.6	4.6	4.7	4.6	4.585	45.85
	3	635	3.9	1.52315	335.2	4.7	0.0859487	117	8344.34	2139.57	4.5	4.3	4.3	4.5	4.2	4.2	4.4	4.2	4	4.1	4.3	4.1	4.8	4.3	4.3	4.6	4.3	4.7	4.3	4.9	4.365	43.65
	4	665	4.1	1.39418	384.3	5.3	0.0937317	84	6090.79	1485.56	4.5	4.7	4.7	5	4.9	4.7	4.9	5	5	4.8	5	5.2	4.5	4.5	4.9	4.5	4.9	4.9	4.9	4.8	4.815	48.15
	5	625	3.65	1.49504	399.5	5	0.109452	93	7430.7	2035.81	4.5	5	4.3	4.9	4.5	4.2	4.3	4.9	4.8	4.6	4.3	4.3	4.5	4.7	4.5	5	5	4.8	4.6	4.4	4.605	46.05
	6	655	3.7	1.31667	387.4	4.5	0.104703	81	6973.2	1884.65	5.2	5	3.8	5	5	4.2	4.7	4.7	4.8	4.8	5.2	5	5	5.1	4.1	4.7	5.2	5	4.7	5.2	4.82	48.2
	7	680	4.55	1.44705	341	4.4	0.0749451	105	8137.5	1788.46	4	4.3	4.2	4.3	4.3	4.5	4.5	4.5	4.2	4.3	4.7	4.5	4.3	4.3	4.5	4.3	4.5	4.1	4.2	4.2	4.335	43.35
	Mean	652.143	3.85714	1.38977	334.9	4.71429	0.0870583	94.8571	6732.46	1740.97																					4.54
	SEM	7.85714	0.148175	0.0389332	24.0814	0.156492	0.00619026	4.68751	524.836	113																					0.0864856
2	1	645	3.75	1.3975	360.5	4.9	0.0961333	77	5665	1510.67	4.8	4.6	5	5	4.8	4.8	4.3	4.3	5.3	5	4.7	5	4.8	4.8	5.1	4.2	5	4.8	4.7	4.8	4.79	47.9
22oC	2	615	3.5	1.50467	398.8	5	0.113943	77	6141.52	1754.72	4.8	4.7	4.8	4.9	5	4.8	4.7	5	5	5.3	4.3	4.4	4.5	5.1	4.8	4.1	4.7	4.9	4.5	4.3	4.73	47.3
	3	650	4.2	1.52936	418.6	4.4	0.0996667	85	8086.59	1925.38	4.3	4.8	4.9	4.5	4	4	4.9	3.9	4.7	4.8	3.5	4.8	3.8	4.6	4.2	4.7	4.3	4.8	4.5	4.3	4.415	44.15
	4	650	4.1	1.49294	453.5	5	0.11061	80	7256	1769.76	4.3	4.5	4.5	4.8	5	4.5	4.9	4.7	4.8	4.5	4.3	5	4.8	4.7	4.8	4.8	4.7	5	4.7	4.5	4.69	46.9
	5	655	4	1.42343	278.8	4.8	0.0697	105	6098.75	1524.69	4.3	4.8	4.2	4	4	4	4	4	4.2	4.5	4.3	4.3	4.5	4	4	3.5	4	4	4.2	4.2	4.15	41.5
	6	665	4.8	1.63221	498.5	4.9	0.103854	87	8850.92	1843.94	4.3	3.8	4.3	4.5	4.5	4.5	4.3	4.8	4.3	4.5	4.6	5	5	4.6	4.3	4.7	4.3	4.8	4	4.7	4.49	44.9
	7	665	4.55	1.5472	405.1	4.5	0.089033	90	8102	1780.66	4.8	4.8	4.7	4	4.5	4	5	4.8	4.6	4.8	4.8	4.6	4.9	4.7	4.3	5.1	4.8	4	4.6	4.8	4.63	46.3
	Mean	649.286	4.12857	1.5039	401.971	4.78571	0.0975628	85.8571	7171.54	1729.97																					4.55643
	SEM	6.40206	0.168275	0.0296421	26.3495	0.0911006	0.00563508	3.70603	463.219	58.9943																					0.0841676
3	1	620	3.2	1.34269	371.8	4.8	0.116187	66	5112.25	1597.58	5.3	5	5.1	4.3	5	5.1	4.7	4.9	5.3	5.3	5	5.3	5.3	5	5.3	5.4	5.1	5.1	5.4	5.6	5.125	51.25
22pellet	2	645	4.3	1.60247	612	4.9	0.142326	57	7119.18	1655.62	5.5	5.1	5.5	5.3	5.3	5.3	5.5	5.5	5.1	5.3	5.5	5.5	5.7	5.3	5.3	5.5	5.5	5.6	5.7	5.3	5.415	54.15
	3	665	4.1	1.39418	551.1	5.2	0.134415	76	8054.54	1964.52	5.2	5.6	5.3	5.3	5.5	5.3	5.2	5.4	5	5	4.9	5.2	5.7	5	5.3	5	5.3	5.3	5.2	5.2	5.245	52.45
	4	640	3.5	1.33514	444.9	4.9	0.127114	71	6446.51	1841.86	5.2	4.8	5.2	5.3	4.6	5	5.5	5.2	4.6	5.2	5	5.4	5.1	4.7	5.2	5.2	5.2	5.3	5.5	5	5.11	51.1
	5	670	4.2	1.39645	615.3	5	0.1465	61	7506.66	1787.3	5.8	5.2	5.3	5.5	5	5.2	5.6	5.3	5.3	5.3	5.5	5.6	5.3	5.2	5.3	5.2	5	4.8	4.7	5.2	5.265	52.65
	6
	7
	Mean	648	3.86	1.41419	519.02	4.96	0.133308	66.2	6847.83	1769.38																					5.232
	SEM	7.62983	0.182444	0.0411984	40.5814	0.0573212	0.00458275	2.87104	428.333	55.4562																					0.0467058
											Foll diam
	Statistics
	F	0.075	0.849	2.629	7.973		14.583		0.222	0.049	15.653
	P	0.928	0.446	0.103	0.004		0.0001		0.803	0.953	0.0001
	means				a		a				a
					a		a				a
					b		b				b

## Sheet: Sample 4
Group	Fish	Length (mm)	Weight (kg)	Condition Factor	Gonad Wt. (g)	Gonad sub-sample (g)	G.S.I. (%)	Follicle Count	Fecundity	Relative Fecundity	Follicle Diameters (mm)
											1	2	3	4	5	6	7	8	9	10	11	12	13	14	15	16	17	18	19	20	Mean fd
1	1	680	4.5	1.43115	591	4.1	0.131333	61	8792.93	1953.98	5	5.2	4.8	5	4.5	4.8	4.8	5.3	5	5	5	5.2	5.2	5.3	5.5	5	5.6	5.2	5	5	5.07	50.7
14oC	2	640	3.62	1.38092	517	4.9	0.142818	66	6963.67	1923.67	5.1	5.3	4.9	5.2	5.3	5.3	5.2	5	5	5	5.2	5.2	5	5.3	5	5.3	5.2	5.4	5.1	5.1	5.155	51.55
	3	655	4.7	1.67253	631	4.2	0.134255	64	9615.24	2045.8	5.2	5	5.1	4.7	5	5.2	5	5.6	5.1	4.9	4.3	5	5.1	5.2	5.2	5.2	5.2	5.3	5.3	5.2	5.09	50.9
	4	645	3.52	1.31179	360	5.7	0.102273	76	4800	1363.64	5	5	5.2	4.9	5	5.6	5.5	5	5.2	5	5	5.1	4.8	4.8	5.2	5	5	5	5.4	5	5.085	50.85
	5	615	3.16	1.35851	318	4.2	0.100633	70	5300	1677.22	4.6	4.3	4.7	4.4	4.3	4.5	4.7	4.8	5	4.8	4.3	4.5	5	4.8	4.6	4.8	4.8	4.8	5.2	4.9	4.69	46.9
	6	580	3.32	1.70159	431	5.2	0.129819	70	5801.92	1747.57	4.8	4.6	5	5	5	4	5	5.3	5.3	5.3	4.2	5.5	5	4.6	5.3	5.2	5.2	5.5	5.3	5.2	5.015	50.15
	7	615	3.44	1.47888	477	5	0.138663	72	6868.8	1996.74	4.5	4.7	5.2	5	5	4.7	4.8	5	5.2	5.2	5.2	5.3	5.2	5	4.7	4.7	5.2	5	4.8	5.2	4.98	49.8
	Mean	632.857	3.75143	1.47648	475	4.75714	0.125685	68.4286	6877.51	1815.52																					5.01214
	SEM	12.289	0.226983	0.0580111	43.4714	0.229759	0.00647365	1.92548	674.942	90.5908																					0.0577232
2	1	660	4.46	1.55133	403	5.8	0.0903587	95	6600.86	1480.01	4.2	4.5	4.8	5	4.5	4.9	5	5	5	5	4.9	5	4.3	4.5	4.2	4.8	5	4.9	5.2	5	4.785	47.85
22oC	2	650	3.63	1.3218	228	4.8	0.0628099	144	6840	1884.3	4.1	3.9	3.8	3.4	4	4	3.5	3.6	3.6	3.6	3.8	3.8	3.6	3.5	3.5	3.6	3.8	3.4	4.1	4	3.73	37.3
	3	680	4.44	1.41207	323	3.7	0.0727477	80	6983.78	1572.92	4.1	4.3	3.9	4.2	4.5	4.5	4.5	4.5	4.5	3.5	4.5	4.5	4.5	3.8	4.4	4.5	4	3.6	4.5	4.5	4.265	42.65
	4	650	3.86	1.40555	380	4.5	0.0984456	76	6417.78	1662.64	3.3	4.2	4.2	3.5	4	4.8	4.5	3.9	4.2	4.5	4.7	4.5	4.7	4.8	4.8	4.9	4.6	4.8	4.5	4.6	4.4	44
	5	695	4.62	1.37622	530	4.9	0.114719	100	10816.3	2341.2	4.3	4.6	4.3	4.4	4.3	4.3	4.4	4.4	4.3	4.5	4.5	4.5	4.7	4.3	4.2	4.5	4.7	4.2	4.3	4.3	4.4	44
	6	655	3.78	1.34514	442	4.7	0.116931	80	7523.4	1990.32	4.3	4.5	4.7	4.8	4.5	4.7	4.6	4.6	4.8	4.6	4.6	4.7	4.8	4.7	4.6	4.7	4.5	4.7	4.5	4.6	4.625	46.25
	7	620	3.46	1.45178	392	4.4	0.113295	69	6147.27	1776.67	4.6	5.2	4.6	4.5	4.3	5	4.7	5	4.5	4.8	5.2	5.3	5	5	4.8	4.7	4.8	4.9	4.9	4.9	4.835	48.35
	Mean	658.571	4.03571	1.40913	385.429	4.68571	0.0956152	92	7332.78	1815.44																					4.43429
	SEM	9.04449	0.174381	0.0288114	35.5781	0.238476	0.00811616	9.57427	603.845	109.97																					0.142007
3	1	640	4	1.52588	565	5.5	0.14125	66	6780	1695	4.6	4.8	5.2	5	5	5.2	5	5.5	5	5.2	5.6	6.5	5	5.2	4.9	5	5.8	5	5.5	5.3	5.215	52.15
22pellet	2	630	3.16	1.26376	306	4.7	0.0968354	65	4231.91	1339.21	5.3	5.3	5	5	5.6	4.9	5.8	5.3	5.3	5.5	4.8	5.8	4.8	4.5	5.2	4.8	4.8	5.3	5	5.1	5.155	51.55
	3	710	5.5	1.53669	862	6.1	0.156727	69	9750.49	1772.82	5.5	5.5	5.5	5.5	6	5.5	5.6	5.8	5.6	5.8	5	4.8	5.9	5.7	5.6	5.5	5.6	5.6	5.7	5.7	5.57	55.7
	4	690	4.72	1.43679	494	5.9	0.104661	83	6949.49	1472.35	5.6	5.2	5.2	5.7	5.3	5.3	5.3	5.2	4.8	5.2	5.5	5.8	5	5.5	5.2	5.6	6	5.8	5.4	5.4	5.4	54
	5
	6
	7
	Mean	667.5	4.345	1.44078	556.75	5.55	0.124868	70.75	6927.97	1569.85																					5.335
	SEM	14.5978	0.377832	0.0477057	87.3032	0.234013	0.0108617	3.15285	852.383	75.4534																					0.0711303
											Foll diam
	Statistics
	F	1.995	1.068	0.505	1.997		4.109		0.124	1.451	16
	P	0.171	0.368	0.613	0.17		0.038		0.884	0.265	0.0001
	means						b				b
							a				a
							b				b

## Sheet: Fert etc
	GSI	EGG DIAM	SEM EGG DIAM	EGG VOL	SEM EGG VOL	FERT	SURVIVAL				WEIGHT	SEM WEI	LENGTH	SEM LEN	CF	SEM CF	FECUN	SEM FECUN	REL FECUN	SEM REL FECUN		DAY	G1	G2	G3
14°C	20.6614	5.782	0.0284	101.297	1.4962	84.3931	71.05				4.13	0.194	656.429	11.5838	1.4561	0.0306	7.074	0.5074	1.7193	0.1077		-3	0	0	0
22°C	11.2099	5.422	0.0759	83.6897	3.5093	65.7075	48.3				3.928	0.3187	667	17.2916	1.3111	0.0254	4.8166	1.262	1.1741	0.2439		0	0	0	0
22°C/E2	16.2427	6.0553	0.0174	116.308	1.0038	26.0181	6.2				4.14	0.6004	666.667	32.1887	1.3801	0.029	5.0813	1.3671	1.1956	0.1905		4	14.2857	0	0
																						7	28.5714	0	0
																						11	71.4286	14.2857	0
																						14	85.7143	28.5714	33.3333
																						18	85.7143	57.1429	33.3333
																						21	85.7143	57.1429	50
																						24	100	71.4286	50

## Sheet: qPCR
Exp4 liver expressed genes-CTs
GE health kit RNA extraction
Quagen quanti-tect kit cDNA synth, 0.3ug RNA (20ul react)
SYBR, 10ul reaction, 1ul undiluted template
	ERa rest of ring 7	Ct ERa	Ct Vtg	Ct ZPC	Ct ZPB	Ct TATA	Ring 1
111		20.96	10.75	15.46	18.14	26.76
112		20.78	10.52	15.29	17.96	25.72
113		21.28	11.34	15.92	18.43	26.59			Controls
114		20.3	9.94	14.58	16.86	25.99			Ct ERa	Ct Vtg	Ct ZPC	Ct ZPB	Ct TATA
115		20.66	10.65	14.82	17.13	26.17			20.67	13.82	15.9	19.26	26.63
116		19.65	9.44	14.13	16.83	25.44
117		20.68	10.5	14.82	17.08	26.16
		Ct ERa	Ct Vtg	Ct ZPC	Ct ZPB	Ct TATA
211		20.94	11.26	14.81	17.1	26.37
212		21.03	10.87	14.77	16.86	26.4
213		21.38	11.97	15.41	17.62	26.19
214		19.91	8.87	12.41	14.77	25.59	Ring 2
215		19.82	9.19	12.71	15.11	25.38
216		25.53	14.37	16.11	20.32	30.31
217		24.34	11.97	16.4	18.97	28.5
		Ct ERa	Ct Vtg	Ct ZPC	Ct ZPB	Ct TATA			Controls
221		20.85	9.69	13.59	16.83	25.46			Ct ERa	Ct Vtg	Ct ZPC	Ct ZPB	Ct TATA
222		19.87	10	13.48	16.48	25.65			20.67	13.28	15.01	18.29	27
223		19.74	9.11	12.72	15.7	25.53
224		21.28	10.37	13.91	17.03	25.61
225		21.08	9.94	13.75	16.8	25.39
226		19.85	9.25	12.93	15.76	25.03
		Ct ERa	Ct Vtg	Ct ZPC	Ct ZPB	Ct TATA	Ring 3
231		666	666	666	666	24.03
232		19.9	11.62	14.95	18.34	25.36
233		20.94	9.51	14.11	17.73	25.92			Controls
234		22.79	10.84	13.71	17.96	26.75			Ct ERa	Ct Vtg	Ct ZPC	Ct ZPB	Ct TATA
235		20.75	9.2	13.57	16.79	25.92			20.67	13.37	15.12	18.45	26.99
236		20.47	10.32	14.03	17.43	26.22
		Ct ERa	Ct Vtg	Ct ZPC	Ct ZPB	Ct TATA
311		21.27	11.69	15.63	17.75	25.63
312		19.32	9.89	13.62	15.7	25.5
313	ERa Ring 8	21.49	12.09	15.88	18.15	25.22
314		21.68	11.2	14.9	16.6	26.11
315		21.02	10.82	14.58	17.32	26.14	Ring 4
316		19.95	10.22	13.67	16.08	26.08
317		21.21	11.41	14.94	17.14	27.13
		Ct ERa	Ct Vtg	Ct ZPC	Ct ZPB	Ct TATA
321		19.66	10.51	13.64	16.43	25.96			Controls
322		19.77	10.73	13.81	17.12	25.68			Ct ERa	Ct Vtg	Ct ZPC	Ct ZPB	Ct TATA
323		19.38	10.34	13.18	16.92	25.36			21.37	13.11	14.84	18.15	27.14
324		19.78	10.46	13.53	16.65	26.09
325		19.6	10.43	13.18	16.35	25.31
326		19.21	9.65	12.62	16.61	25.16
327		20.63	11	14.21	17.03	26
		Ct ERa	Ct Vtg	Ct ZPC	Ct ZPB	Ct TATA	Ring 5
331		19.84	8.77	12.44	15.53	25.59
332		20.8	9.34	13.36	16.38	26.57
333		20.69	9.54	13.48	16.93	26.2			Controls
334		20.17	9.15	12.89	15.86	25.3			Ct ERa	Ct Vtg	Ct ZPC	Ct ZPB	Ct TATA
335		20.54	9.17	13.12	16.41	25.57			21.37	13.36	15	18.21	26.98
		Ct ERa	Ct Vtg	Ct ZPC	Ct ZPB	Ct TATA
411		18.84	8.6	11.17	13.32	24.92
412		19.39	8.88	11.14	13.62	25.21
413		19.2	8.71	11.35	13.43	24.7
414		19.27	8.62	11.14	13.28	25.01
415		19.11	8.58	11.29	13.31	24.97
416		20.37	10.4	12.75	15.43	25.75	Ring 6
417		19.74	9.38	11.69	14.21	25.66
		Ct ERa	Ct Vtg	Ct ZPC	Ct ZPB	Ct TATA
421		19.77	9.69	12.09	14.93	25.31			Controls
422		18.89	8.83	12.45	14.91	24.45			Ct ERa	Ct Vtg	Ct ZPC	Ct ZPB	Ct TATA
423		18.71	8.53	11.79	14.08	24.37			21.37	13.37	15	18.46	27.2
424		19.31	8.78	12.13	14.15	24.97
425		19.02	8.72	12.1	14.19	24.81
426		19.26	8.89	12.07	14.95	25
427		18.87	8.57	12.13	14.12	24.75
		Ct ERa	Ct Vtg	Ct ZPC	Ct ZPB	Ct TATA
431		19.43	10.09	12.82	15.3	25.31
432		18.71	8.98	11.93	14.88	24.94	Ring 7		Controls
433		18.68	8.57	11.36	13.87	25.17			Ct ERa	Ct Vtg	Ct ZPC	Ct ZPB	Ct TATA
434		18.8	9.8	12.28	15.3	25.4			21.37	13.04	14.68	18.54	27.67

## Sheet: LH FSH
		Groups	14˚C	22˚C					Feb	1
		E2	x	3					early March	2
		Blank	1	2					late March	3
									April	4
									100ul for FSH	Cuf off 95%
									80ul for LH	Cut off 80%
									except for test dilutions
									666= missing data
									444= below LOD
	FSH			LH
Fish #	% Binding	ng/tube	ng/ml	% Binding	ng/tube	ng/ml
111	95	0.05527	0.5527
112	110.7	444	444
113	94.33	0.06474	0.6474
114	113.5	444	444
115	90.19	0.11449	1.1449
116	110	444	444
117	86.13	0.15745	1.5745
211	92.13	0.09231	0.9231
212	89.86	0.11223	1.1223
213	96.68	444	444
214	92.75	0.08493	0.8493
215	96.85	444	444
216	92.75	0.08493	0.8493
217	666	666	666
221	89.92	0.11742	1.1742
222	92.46	0.0884	0.884
223	97.26	444	444
224	91.27	0.10569	1.0569
225	93.16	0.07988	0.7988
226	85.65	0.16685	1.6685
227
231	111.1	444	444
232	90.64	0.10159	1.0159
233	94.55	0.06165	0.6165
234	97.5	444	444
235	98.73	444	444
236	86.11	0.15766	1.5766
311	95.25	444	444	71.82	0.06313	0.789125
312	95.29	444	444	83.96	444	444
313	86.12	0.16097	1.6097	80.07	0.05511	0.688875
314	94.67	0.05994	0.5994	76	0.03512	0.439
315	94.47	0.06278	0.6278	70.05	0.06846	0.85575
316	94.1	0.06776	0.6776	59.64	0.10322	1.29025
317	97.26	444	444	96.11	444	444
321	94.84	0.05762	0.5762	73.68	0.0577	0.72125
322	80.52	0.23111	2.3111	666	0.04913	0.614125
323	105.4	444	444	69.59	0.06987	0.873375
324	88.82	0.12939	1.2939	78.82	0.04319	0.539875
325	85.42	0.16479	1.6479	80.09	0.03968	0.496
326	95.53	444	444	67.95	0.07496	0.937
327	95.17	444	444	73.72	0.05758	0.71975
331	97.83	444	444	82.15	444	444
332	89.06	0.12676	1.2676	74.73	0.05468	0.6835
333	96.31	444	444	80.88	0.03753	0.469125
334	97.13	444	444	77.66	0.04642	0.58025
335	110.4	444	444	87.4	444	444
411	92.09	0.09279	0.9279	d	0.04525	0.565625
412	98.69	444	444	81.07	444	444
413	90.54	0.11063	1.1063	84.7	444	444
414	666	666	666	666	666	666
415	90.08	0.10926	1.0926	666	0.05412	0.6765
416	97.54	444	444	74.88	0.05424	0.678
417	95.53	444	444	75.81	0.05161	0.645125
421	55.78	0.58794	5.8794	666	0.06512	0.814
422	95.82	444	444	76.86	0.04865	0.608125
423	73	0.29063	2.9063	666	666	666
424	95.45	444	444	79.17	0.04223	0.527875
425	90.29	0.11336	1.1336	75.88	0.05141	0.642625
426	92.83	0.08393	0.8393	77.69	0.04633	0.579125
427	97.01	444	444	79.51	0.04128	0.516
431	89.06	0.12676	1.2676	72.39	0.06146	0.76825
432	91.64	0.09806	0.9806	75.85	0.05148	0.6435
433	93.03	0.08127	0.8127	666	0.0235	0.29375
434	89.59	0.121	1.21	80.69	0.03803	0.475375
